# Supplementary material for: Idiopathic intracranial hypertension: consensus guidelines on management
Source: PubMed Central journal article supplement (PMC6166610; doi:10.1136/jnnp-2017-317440), 2018-06-14
Supplement: jnnp-2017-317440supp001.pdf [file jnnp-2017-317440supp001.pdf]

**Supplementary Table 1: Differential diagnosis of Papilloedema [19];**

|                                                                    |                                        |                                                                                                                                   |
|--------------------------------------------------------------------|----------------------------------------|-----------------------------------------------------------------------------------------------------------------------------------|
| <b>Pseudopapilloedema</b>                                          | Congenitally anomalous discs           | Small nerves that lack a physiological cup.                                                                                       |
|                                                                    | Optic nerve head drusen                | Globular hyaline bodies, which may be calcified.                                                                                  |
|                                                                    | Hypermetropic discs                    | May appear crowded and elevated                                                                                                   |
|                                                                    | Myopic discs                           | Often elevated nasally and can show leakage in fundus angiography                                                                 |
|                                                                    | Myelinated nerve fibres                |                                                                                                                                   |
| <b>Bilateral disc swelling</b>                                     | Infective                              | e.g. Lyme disease, cat scratch disease, and syphilis.                                                                             |
|                                                                    | Inflammatory                           | e.g. Optic neuritis; Uveitis; Scleritis                                                                                           |
|                                                                    | Hypertensive crisis                    |                                                                                                                                   |
|                                                                    | Toxic                                  | e.g. antimicrobials, immunomodulators, chemotherapeutic agents                                                                    |
|                                                                    | Metabolic                              | Diabetes                                                                                                                          |
|                                                                    | Hereditary and mitochondrial disorders | e.g. Lebers Hereditary Optic Neuropathy                                                                                           |
|                                                                    | Compressive                            | Tumours of the optic nerve (sheath meningioma or glioma); Thyroid eye disease                                                     |
| <b>Unilateral disc swelling that uncommonly occurs bilaterally</b> | Vascular                               | Non-arteritis anterior ischaemic optic neuropathy; Arteritic anterior ischaemic optic neuropathy; Central retinal vein occlusions |
