# Supplementary material for: Idiopathic intracranial hypertension: consensus guidelines on management
Source: PubMed Central journal article supplement (PMC6166610; doi:10.1136/jnnp-2017-317440), 2018-06-14
Supplement: jnnp-2017-317440supp003.pdf [file jnnp-2017-317440supp003.pdf]

**Appendix 2: Audit recommendations from consensus guidance in IIH.**

|                                                                                             | Quality standard |
|---------------------------------------------------------------------------------------------|------------------|
| <b>Investigations:</b>                                                                      |                  |
| Formal visual fields at identification of papilloedema                                      | 100%             |
| Lumbar puncture                                                                             | 100%             |
| LP OP recorded                                                                              | 100%             |
| Brain imaging                                                                               | 100%             |
| Brain imaging within 24 hours                                                               | 75%              |
| Brain Venography within 24 hours                                                            | 75%              |
| ALL neuroimaging within 48hours                                                             | 100%             |
| <b>Management:</b>                                                                          |                  |
| Documentation of weight management discussed with patient.                                  | 100%             |
| BMI recorded at each visit.                                                                 | 100%             |
| Where a drug/each drug was used, explanation of side effects documented.                    | 100%             |
| Potential tetragenicity of relevant medications discussed.                                  | 100%             |
| Those with papilloedema, ongoing ophthalmology assessment (including formal visual fields). | 100%             |
| Those with Headache, ongoing headache management.                                           | 100%             |
